# Supplementary material for: Biofilm Formation Drives Transfer of the Conjugative Element ICEBs1 in Bacillus subtilis
Source: PubMed Central journal article supplement (PMC6158512; doi:10.1128/msphere.00473-18), 2018-09-26
Supplement: sph005182649sf3.pdf [file sph005182649sf3.pdf]

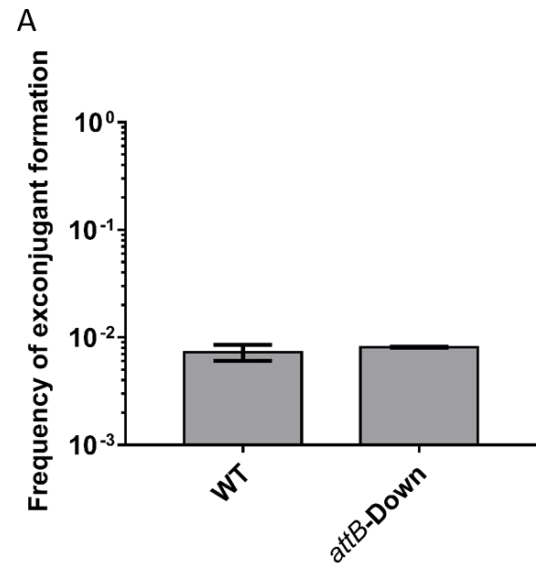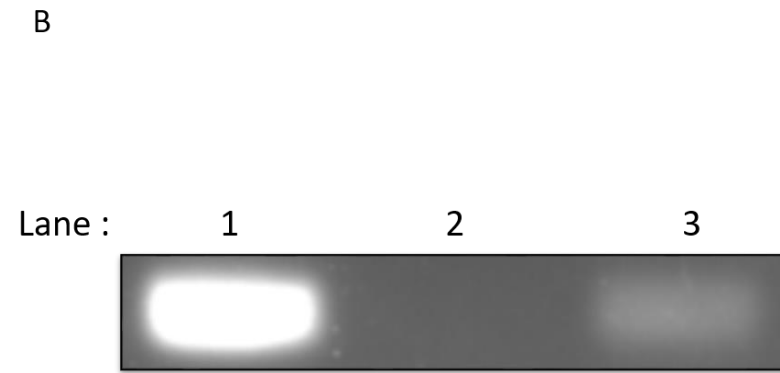

Fig. S3
