# Supplementary material for: Biofilm Formation Drives Transfer of the Conjugative Element ICEBs1 in Bacillus subtilis
Source: PubMed Central journal article supplement (PMC6158512; doi:10.1128/msphere.00473-18), 2018-09-26
Supplement: sph005182649st1.pdf [file sph005182649st1.pdf]

**Table S1**

|                           | Concentration at 20 h<br>(CFU/ml)       |
|---------------------------|-----------------------------------------|
| WT donors (FL62)          | $6.93 \times 10^8 \pm 2.71 \times 10^8$ |
| WT recipient (MG25)       | $1.03 \times 10^9 \pm 3.56 \times 10^8$ |
| <i>recA</i> donors (FL92) | $2.30 \times 10^7 \pm 2.00 \times 10^6$ |
| WT recipient (MG25)       | $1.33 \times 10^9 \pm 4.44 \times 10^7$ |
