# Supplementary material for: Biofilm Formation Drives Transfer of the Conjugative Element ICEBs1 in Bacillus subtilis
Source: PubMed Central journal article supplement (PMC6158512; doi:10.1128/msphere.00473-18), 2018-09-26
Supplement: sph005182649st2.pdf [file sph005182649st2.pdf]

| Strain | Genotype                                                                            | Construction                           |
|--------|-------------------------------------------------------------------------------------|----------------------------------------|
| 168    | <b>Domesticated strain</b>                                                          | Lab stock                              |
| 3610   | <b>Wild type</b> Undomesticated strain                                              | Lab stock                              |
| VCL28  | 168 <i>ycbU-lmrB::spec</i>                                                          | See Methods                            |
| MG28   | <i>ICEBsI-kan</i>                                                                   | JMA384 <sup>1</sup> in 3610            |
| FL62   | <i>ICEBsI-kan ycbU-lmrB::spec</i>                                                   | VCL28 in MG28                          |
| MG13   | <i>ICEBsI</i> <sup>0</sup>                                                          | JMA208 <sup>1</sup> in 3610 and curing |
| MG25   | <i>ICEBsI</i> <sup>0</sup> <i>ylnF/yboA::Tn917::amyE::cat</i>                       | PB514 <sup>#</sup> in MG13             |
| FL66   | <i>ICEBsI</i> <sup>0</sup> <i>comK::cat</i>                                         | CAL419 <sup>1</sup> in MG13            |
| FL80   | <i>ICEBsI-kan ycbU-lmrB::spec nicK::erm</i>                                         | BKE04870 <sup>2</sup> in FL62          |
| FL83   | <i>ICEBsI-kan ycbU-lmrB::spec cwlT::erm</i>                                         | BKE04970 <sup>2</sup> in FL62          |
| FL104  | <i>ICEBsI</i> <sup>0</sup> <i>comK::cat ycbU-lmrB::spec</i>                         | VCL28 in FL66                          |
| FL103  | <i>ICEBsI-kan nicK::erm</i>                                                         | BKE04870 <sup>2</sup> in MG28          |
| FL105  | <i>ICEBsI-kan nicK::erm comK::cat</i>                                               | CAL419 <sup>1</sup> in FL103           |
| FL106  | <i>ICEBsI-kan comK::cat</i>                                                         | CAL419 <sup>1</sup> in MG28            |
| FL91   | <i>(rapI phrI)342::kan ycbU-lmrB::spec</i>                                          | CAL51 <sup>1</sup> and VCL28 in 3610   |
| FL92   | <i>ICEBsI-kan ycbU-lmrB::spec recA::erm</i>                                         | BKE16940 <sup>2</sup> in FL62          |
| FL96   | <i>(rapI phrI)342::kan ycbU-lmrB::spec recA::erm</i>                                | BKE16940 <sup>2</sup> in FL91          |
| FL63   | <i>ICEBsI-kan amyE::PtapA-yfp</i>                                                   | CA018 <sup>3</sup> in MG28             |
| FL60   | <i>ICEBsI</i> <sup>0</sup> <i>ylnF/yboA::Tn917::amyE::cat lacA::PtapA-yfp</i>       | DL821 <sup>4</sup> in MG25             |
| JSB7   | 168 <i>attB-down::erm</i>                                                           | See Methods                            |
| JSB18  | <i>ICEBsI</i> <sup>0</sup> <i>attB-down::erm</i>                                    | This study                             |
| JSB19  | <i>ICEBsI-kan ylnF/yloA::Tn917::amyE::cat</i>                                       | PB514 <sup>#</sup> in MG28             |
| FL93   | <i>ICEBsI-kan sinR::spec</i>                                                        | PB194 <sup>#</sup> in MG28             |
| FL94   | <i>ICEBsI</i> <sup>0</sup> <i>ylnF/yboA::Tn917::amyE::cat sinR::spec</i>            | PB194 <sup>#</sup> in MG25             |
| MG44   | <i>ICEBsI-kan tasA::erm epsA-O::tet</i>                                             | SSB569 <sup>#</sup> in MG28            |
| FL77   | <i>ICEBsI-kan ycbU-lmrB::spec tasA::erm eps::tet</i>                                | VCL28 in MG44                          |
| MG43   | <i>ICEBsI</i> <sup>0</sup> <i>ylnF/yboA::Tn917::amyE::cat tasA::erm epsA-O::tet</i> | SSB569 <sup>#</sup> in MG38            |

|      |                                                             |                             |
|------|-------------------------------------------------------------|-----------------------------|
| FL87 | ICEBsI-kan ycbU-lmrB::spec epsA-O::tet                      | SSB569 <sup>#</sup> in FL62 |
| FL90 | ICEBsI <sup>0</sup> ylnF/yboA::Tn917::amyE::cat epsA-O::tet | SSB569 <sup>#</sup> in MG25 |
| FL88 | ICEBsI-kan ycbU-lmrB::spec tasA::erm                        | SSB569 <sup>#</sup> in FL62 |
| MG38 | ICEBsI <sup>0</sup> ylnF/yboA::Tn917::amyE::cat tasA::erm   | SSB569 <sup>#</sup> in MG25 |

\*Unless indicated, all strains are derivatives of *B. subtilis* NCIB 3610. Antibiotics: spectinomycin (spec), chloramphenicol (cat), erythromycin/lincomycin (erm), tetracycline (tet), kanamycin (kan).

#These strains come from the Kolter and/or Beaugard lab stock.

- 1- Auchtung, J. M., Lee, C. A., Monson, R. E., Lehman, A. P., Grossman, A. D. (2005) Regulation of a *B. subtilis* mobile genetic element by intercellular signaling and the global DNA damage response. *Proc. Natl. Acad. Sci. USA* **102**, 12554–12559.
- 2- Koo, B. M. *et al.* (2017) Construction and analysis of two genome-scale deletion libraries for *Bacillus subtilis*. *Cell Syst.* **4**, 291-305.e7.
- 3- Vlamakis, H., Aguilar, C., Losick, R., Kolter, R. (2008) Control of cell fate by the formation of an architecturally complex bacterial community. *Genes & Dev.* **22**, 945-953.
- 4- López, D., Vlamakis, H., Losick, R., Kolter, R. (2009) Cannibalism Enhances Biofilm Development in *Bacillus subtilis*. *Mol. Microbiol.* **74**, 609-618.
