# Supplementary material for: Biofilm Formation Drives Transfer of the Conjugative Element ICEBs1 in Bacillus subtilis
Source: PubMed Central journal article supplement (PMC6158512; doi:10.1128/msphere.00473-18), 2018-09-26
Supplement: sph005182649st3.pdf [file sph005182649st3.pdf]

**Table S3**

|                                                                               | LB                                      | LBGM                                    | MSNc                                    | MSgg                                    |
|-------------------------------------------------------------------------------|-----------------------------------------|-----------------------------------------|-----------------------------------------|-----------------------------------------|
| 3610 ICEBsI- <i>kan ycbU-lmrB::spec</i> (Donor)                               | $3.97 \times 10^8 \pm 4.89 \times 10^7$ | $1.00 \times 10^9 \pm 2.62 \times 10^8$ | $3.60 \times 10^8 \pm 5.33 \times 10^7$ | $9.27 \times 10^8 \pm 1.64 \times 10^8$ |
| 3610 ICEBsI <sup>0</sup><br><i>ylnF/yboA::Tn917::amyE::cat</i><br>(Recipient) | $7.70 \times 10^8 \pm 2.20 \times 10^8$ | $1.50 \times 10^9 \pm 4.00 \times 10^8$ | $4.87 \times 10^8 \pm 3.11 \times 10^7$ | $1.37 \times 10^9 \pm 1.78 \times 10^8$ |

Concentration is expressed in CFU/ml
